# Supplementary material for: A ZnO@ZIF-8/Ag Dual-Platform Nanocomposite Synergizing ROS Generation for Bactericidal-Immunomodulatory Wound Therapy
Source: Research Square preprint supplement (doi:10.21203/rs.3.rs-7961947/v1), 2026-02-12
Supplement: Supplementary file 1 [file f7ad46674a379cf9ffa3f296.docx]

**A ZnO@ZIF-8/Ag Dual-Platform Nanocomposite Synergizing ROS Generation for Bactericidal-Immunomodulatory Wound Therapy**

1. Experimental section 2

1.1 Materials 2

1.2 Preparation of the nanoparticles 2

1.3 Characterization of the NPs 4

1.4 Mechanism by which the nanomaterials generated ROS 4

1.4.1 Electrochemical impedance spectroscopy measurement 4

1.4.2 Density functional theory measurement 5

1.4.3 Active oxygen species test 6

1.4.4 Evaluation of the oxidative effect of ZnO@ZIF-8/Ag NPs on glutathione 7

1.5 In vitro antibacterial activity 7

1.5.1 Filter paper diffusion experiment 7

1.5.2 Colony count 8

1.5.3 Minimum inhibitory concentration 8

1.5.4 Antimicrobial activity 9

1.6 Investigation of antibacterial mechanisms 9

1.6.1 Ion release test 9

1.6.2 Observation of bacterial morphology 10

1.6.3 Live/dead bacterial fluorescence staining 10

1.6.4 Membrane potential analysis 11

1.6.5 Nucleic acid leakage detection 11

1.6.6 Ion leakage test 11

1.6.7 Microcalorimetry 11

1.6.8 Molecular docking 12

1.7 In vivo and in vitro biocompatibility assessment 12

1.7.1 Cell co-culture 12

1.7.2 Hemolysis assay 12

1.7.3 Cell migration 13

1.7.4 In vivo biocompatibility assessment 14

1.8 Assessment of internal wound healing 14

1.8.1 Construction of a bacterial infection wound model 14

1.8.2 Histological analysis 15

1.8.3 Immunofluorescence staining 15

2. Supplementary Figures 16

# 1. Experimental section

## 1.1 Materials

Zinc acetate dihydrate (Zn (CH3COO)2·2H2O), 2-methylimidazole (2-MIM), sodium hydroxide (NaOH), 3-aminopropyltrimethoxysilane (APTMS), sodium citrate (Na3C6H5O7), silver nitrate (AgNO3), sodium borohydride (NaBH4), sodium chloride (NaCl), propyl iodide (PI), potassium permanganate (KMnO4), 2,3,5-triphenyl tetrazolium chloride (TTC), N,N-dimethylformamide (DMF), isopropyl alcohol (IPA), diethylene glycol (DEG), and anhydrous ethanol (CH3CH2OH) were all purchased from Energy Chemical Shanghai Co., Ltd (Shanghai, China). Reduced glutathione (GSH), phosphate-buffered saline (PBS, pH 7.4), 5,5-dimethyl-1-pyrrolidine-N-oxide (DMPO), 2,2,6,6-tetramethylpiperidine-1-oxy (TEMPO), 3,3',5,5'-tetramethylbenzidine (TMB), 1,3-diphenylisobenzofuran (DPBF), and 5,5'-dithiobis-(2-nitrobenzoic acid) (DTNB) were purchased from Shanghai Aladdin Bio-Chem Technology Co. Ltd (Shanghai, China). Escherichia coli (BNCC133264), Staphylococcus aureus (BNCC186335), and drug-resistant Salmonella (CCTCCCB20082358) were provided by the Institute of Microbiology at the Chinese Academy of Sciences. Yeast extract powder, agar, and peptone were bought from Beijing Aoboxing Biotechnology Co., Ltd (Beijing, China), while SYTO-9 stain, hematoxylin and eosin (H&E), Masson’s trichrome stain, and antibodies were purchased from Service Bio (Wuhan, China).

## 1.2 Preparation of the nanoparticles

To prepare the nanoparticles (NPs), 0.01 mol of Zn (CH3COO)2·2H2O was dissolved in 100 mL of DEG, and the solution was placed at 160°C, for 1 h. Following the completion of the reaction, it was then centrifuged at 12,000 rpm for 5 min to collect the ZnO crystal seeds, which was set aside for later use. Next, 0.01 mol of zinc acetate dihydrate was dissolved in 100 mL of DEG. The solution temperature was increased to 130°C, at which point 0.3 mL of the pre-prepared ZnO crystal seeds were added. The reaction temperature was further increased to 160°C, which was maintained for1 h. Following the completion of the reaction, the solution was centrifuged at 12,000 rpm for 5 min to collect the solid product. The product was subjected to a thorough cleansing process, which involved three cycles of deionized water (DI) and CH3CH2OH, to eradicate all traces of impurities. The washed product was dried at 60°C to obtain the white ZnO NPs.

The mass of the ZnO nanoparticles was determined to ensure they weighed 200 mg and the 2-MIM 110 mg. The two substances were then added to 16 mL of a mixed solvent of DMF and H2O, at a volumetric ratio of 10:1. The application of ultrasonic dispersion ensured even mixing. The mixture was then stirred with a magnetic stirrer at a constant temperature of 70°C for 3 h. Subsequent to the reaction, the product was obtained by means of centrifugation and purified by washing thrice alternately with DMF and CH3CH2OH. The product was then dried at 60°C for 5 h. This procedure was undertaken to form the core–shell structured composite material consisting of ZnO@ZIF-8.

To prepare the Ag+ solution, the first step was to dissolve 0.25 mmol/L of Na3C6H5O7 and 0.25 mmol/L of AgNO3 in DI water. A reducing agent was prepared concurrently by dissolving 10 mmol/L NaBH4 in 50 mL of DI. The reduction solution was added gradually to the Ag⁺ solution under ultrasonic assistance, to prepare Ag sol. Subsequently, the silver nanoparticles (Ag NPs) were separated via high-speed centrifugation (12,000 rpm/s, for 10 min) and redispersed in the aqueous dispersion system of the ZnO@ZIF-8 material. After drying in a vacuum drying oven at 60°C, reddish-brown ZnO@ZIF-8/Ag nanocomposites were obtained.

## 1.3 Characterization of the NPs

Fourier transform infrared spectroscopy (FT-IR, TENSOR27, Germany) was employed to investigate the chemical bonds in the ZnO, ZnO@ZIF-8, and ZnO@ZIF-8/Ag. The structural characteristics of the samples were determined using ultraviolet-visible spectrophotometry (UV-Vis, Model UV-6100S, China). The surface morphology, chemical composition/valence states, and crystalline structure of the ZnO, ZnO@ZIF-8, and ZnO@ZIF-8/Ag were characterized by transmission electron microscopy (TEM, Glacios 2 Cryo-TEM, USA), energy-dispersive X-ray spectroscopy (EDS, Quantax75, Germany), X-ray photoelectron spectroscopy (XPS, Thermo Kalpha, USA), and X-ray diffraction (XRD, TK-XRD-201, China). Electron paramagnetic resonance (EPR, EPR200M, China) was used to detect the reactive oxygen species (ROS) generated by the samples, and the surface charge potential was measured using a Zeta potential analyzer (Zetasizer Nano Zs90, UK). The bacterial morphology was observed via scanning electron microscopy (SEM, Sigma 300, Germany), while the live/dead bacterial analysis was performed using fluorescence microscopy (IX73, Germany).

## 1.4 Mechanism by which the nanomaterials generated ROS

### 1.4.1 Electrochemical impedance spectroscopy measurement

Electrochemical impedance spectroscopy (EIS) testing was conducted using an electrochemical workstation (DH7000C, China) with Ag/AgCl as the reference electrode, a glass electrode as the working electrode, and a Pt electrode as the counter electrode to ascertain the charge transfer resistance of the material.

### 1.4.2 Density functional theory measurement

To elucidate the active oxygen generation mechanism of ZnO@ZIF-8/Ag, the VASP.6.2.1 software package was used for density functional theory (DFT) calculations. The Perdew–Burke–Ernzerhof functional, which is based on the generalized gradient approximation (GGA), was used to address the electron exchange–correlation effects. This was combined with Grimme’s DFT-D3 method to account for van der Waals interactions. The computational parameters are as follows: The plane-wave cutoff energy was set to 450 eV, and the projected augmented wave method was used to manage the interactions between the ionic core and valence electrons. Further, the energy convergence threshold was set to 10-5 eV, the atomic force was less than 0.02 eV Å-1, the Brillouin zone was sampled with a 2 × 2 × 1 Gamma-centered k-point grid, and all the calculations took into account the spin-polarization effects. To circumvent the occurrence of periodic mirror interactions, a 15 Å vacuum layer was incorporated into the surface model.

A conventional formula was used to calculate the adsorption energy:

Eads = E(total) − E(slab) − E(adsorbate)

where E(total) represents the optimized total energy of the adsorbate−substrate composite system, E(slab) is the relaxation energy of the clean substrate, and E(adsorbate) is the energy of the isolated adsorbate molecule.

The reaction free energy calculation was implemented using VASPKIT 1.5.1:

Δ*G* = Δ*E* + Δ*EZPE* – TΔ*S*

where Δ*E* is the DFT reaction energy, Δ*EZPE* is the zero-point energy correction, and Δ*S* is the entropy change.

### 1.4.3 Active oxygen species test

To prepare 0.1 mM of a standard KMnO4 solution for H2O2 detection, 0.1 M of H2SO4 solution was added to 3 mL of the 50 μg/mL test sample to adjust the pH to 2–3. Then, 0.1 mM of the KMnO4 solution was added and immediately vortexed to ensure thorough mixing. This solution was kept in the dark at 25°C for 10 min, and the absorbance was measured at 450–600 nm using a UV-Vis spectrophotometer (MAPADA (Shanghai) Instruments Co., Ltd).

The TMB chromogenic method was used to detect the hydroxyl radicals (·OH) generated by nanomaterial catalysis. Briefly, 50 μg/mL of the test sample reacted with 20 μg/mL of the TMB solution in a PBS buffer (pH 7.4) for 30 min. The absorbance at 652 nm was measured immediately.

The DPBF test was carried out to detect singlet oxygen (1O2). At the outset, 2 mg DPBF was dissolved in 2.5 mL DMF and sonicated for 5 min to obtain a homogeneous solution. The material was added to a final concentration of 50 μg/mL and allowed to react under 300 W xenon lamp irradiation for 5 min at room temperature. The absorbance change at 415 nm was measured immediately after the reaction.

For the EPR-specific detection of ·OH and 1O2 in the solid samples, DMPO and TEMP, respectively, were used as trapping agents. Precisely 10 mg of the solid sample was weighed and mixed thoroughly with 1 mL of 20 μM of the trapping agent solution (DMPO for ·OH detection, TEMP for 1O2 detection) under dark conditions. The mixture was then exposed to light for 5 min to induce ROS generation. The sample was transferred to an EPR sample tube, and EPR detection was performed at room temperature. The characteristic signals of the adducts formed by the reaction between the trapping agents and ROS were analyzed to specifically detect ·OH and 1O2.

### 1.4.4 Evaluation of the oxidative effect of ZnO@ZIF-8/Ag NPs on glutathione

To evaluate the oxidative capacity of ZnO@ZIF-8/Ag toward GSH, the consumption of the GSH was determined using a DTNB assay. Initially, a 10 mM GSH solution was co-incubated with varying concentrations of ZnO@ZIF-8/Ag NPs in a PBS buffer (pH 7.4) at 37°C for 1 h. Following incubation, the reaction mixture was combined with the DTNB reagent (final concentration: 0.1 mM) and allowed to react at room temperature for 10 min, which yielded the yellow product 5-thio-2-nitrobenzoic acid (TNB). The absorbance was then measured at a wavelength of 412 nm using a UV-Vis spectrophotometer.

## 1.5 In vitro antibacterial activity

### 1.5.1 Filter paper diffusion experiment

The activated bacterial suspension, which comprised either *E. coli*, *S. aureus*, or DR-*Salmonella* in PBS, was adjusted to a concentration of 5 × 105 CFU/mL and evenly spread on a Luria-Bertani (LB) solid medium.

After air-drying, sterile forceps were used to place filter paper discs onto the surfaces of the LB agar plates that had been inoculated with the bacterial suspension. Different concentrations of the test material were then applied to the discs. After natural air drying, the plates were inverted and placed in a 37°C constant-temperature incubator for 10–12 h. Following incubation, the sizes of the inhibition zones around the filter paper discs were assessed.

### 1.5.2 Colony count

After thoroughly mixing the ZnO@ZIF-8/Ag NPs with the bacterial suspension (1 × 105 CFU/mL) which comprised either *E. coli*, *S. aureus*, or DR-*Salmonella* in an LB broth, for 10, 20, 30, 40, and 50 min, 10 μL of the supernatant was evenly spread on an LB solid medium. The plates were then inverted and cultured at a constant temperature of 37°C for 12 h. A bacterial suspension without any added material served as the blank control group. The experiment was conducted in triplicate.

The antibacterial rate was calculated as follows:

Antibacterial rate (%) = (X− Y) / X × 100%

where X represents the colony count of the blank control group, and Y indicates the colony count after mixing the material with the bacterial suspension for different periods of time.

### 1.5.3 Minimum inhibitory concentration

Each bacteria (i.e., *E. coli*, *S. aureus*, and DR-*Salmonella*) was cultivated until the logarithmic growth phase was reached, after which the bacterial suspension was diluted to 5 × 105 CFU/mL using an LB liquid medium. To circumvent edge effects, 100 μL of PBS was added to the periphery of a 96-well plate. Then, 100 μL of the diluted bacterial suspension was added to columns 2–10. Next, 100 μL of ZnO@ZIF-8/Ag NPs was added to column 2, followed by a 2-fold dilution starting from column 2 and ending in column 9. The bacterial suspension in column 10, which was devoid of any supplementary material, functioned as the positive control, while 100 μL of PBS was added to column 11, which served as the negative control. The 96-well plate was then sealed with a sealing film and incubated at 37°C for 24 h. Following this incubation period, 50 µL of 0.5% TTC was added to each well, and the plate was incubated at 37°C for a further 1 h, during which time a color change was observed. A well displaying red TTC signified the presence of bacterial growth, and the absence of a color change indicated bacterial inhibition.

### 1.5.4 Antimicrobial activity

A total of 200 µL of bacterial suspension (approximately 104 CFU/mL) for each of *E. coli*, *S. aureus*, and DR-*Salmonella* was added to each well in a 24-well cell culture plate. The plate was incubated at 37°C for 48 h, with the culture medium replaced every 24 h. After the formation of a mature biofilm, the medium was discarded, and the biofilm was gently washed twice with PBS to remove planktonic bacteria. The biofilm was fixed with 10% methanol for 10 min at room temperature. The methanol was then removed and the biofilm gently washed with PBS. Each well was stained with 100 µL of 0.5% crystal violet solution for 30 min at room temperature. The staining solution was carefully removed, and the wells were rinsed with distilled water to eliminate any unbound dye. Subsequently, 100 µL of 33% acetic acid solution was added to each well, followed by 10 min of oscillation to decolorize the crystal violet from the biofilm. The acetic acid solution was aspirated, and the wells were washed with distilled water to remove any residual acetic acid. The optical density (OD) of each well was measured at 570 nm using a microplate reader, with higher OD values indicating greater biofilm formation.

## 1.6 Investigation of antibacterial mechanisms

### 1.6.1 Ion release test

The ZnO@ZIF-8/Ag nanocomposite was immersed in deionized water and incubated in a 37°C constant temperature shaker (to simulate physiological conditions) under continuous agitation. At predetermined time intervals, samples were collected and immediately centrifuged at 10,000 rpm for 10 min. The supernatant was filtered through a 0.22 μm membrane to remove any residual NPs. The filtrate was then acidified and analyzed for ion content using inductively coupled plasma mass spectrometry (Thermo Fisher Scientific Inc.).

### 1.6.2 Observation of bacterial morphology

The bacterial suspension containing the ZnO@ZIF-8/Ag NPs and the pure bacterial suspension were transferred separately into a 2.5% glutaraldehyde solution to fix the bacteria. A gradient dehydration process was then conducted using ethanol solutions with concentrations ranging from 20% to 100%. Each ethanol concentration was subjected to a 10-min dehydration period. The bacterial samples were dispersed in 50 mL of ethanol and characterized using SEM Sigma Laborzentrifugen GmbH).

### 1.6.3 Live/dead bacterial fluorescence staining

The bacterial suspension was diluted to a concentration of 108 CFU/mL. The pure bacterial suspension was designated as the control group, while the bacterial suspension containing the ZnO@ZIF-8/Ag NPs was designated as the experimental group. Following thorough mixing and incubation for 1 h, the mixture was washed thrice with PBS. The mixture was subjected to staining with 6 μM SYTO-9 and 15 μM PI for 15 min in conditions of low luminosity and at an ambient temperature. The live and dead cells were observed using a fluorescence microscope (Evident Corporation).

### 1.6.4 Membrane potential analysis

The bacterial suspension was diluted to 106 CFU/mL using a 0.01 mol/L NaCl solution, and changes in the extracellular potential of the bacteria before and after the addition of the ZnO@ZIF-8/Ag NPs were measured using a Zeta potential analyzer Malvern Panalytical Ltd.). To investigate the effects of the incubation time, the Zeta potential was measured at 5 and 40 min, respectively.

### 1.6.5 Nucleic acid leakage detection

The cultured bacterial suspension(1.5 × 108 CFU/mL) was added to the experimental and control groups. The experimental group was supplemented with the ZnO@ZIF-8/Ag NPs, while an equal volume of PBS buffer solution was added to the control group. After incubation, the bacterial cells and supernatant were separated by centrifugation (12,000 rpm for 10 min). The absorbance of the supernatant at a wavelength of 260 nm was measured using an UV-Vis spectrophotometer.

### 1.6.6 Ion leakage test

The bacterial suspension and material-added bacterial suspension were processed using microwave digestion, followed by the detection of the digested samples via inductively coupled plasma mass spectrometry to determine the concentrations of K+, Ca2+, and Mg2+.

### 1.6.7 Microcalorimetry

The cultured bacterial suspension was diluted to 104 CFU/mL. The diluted suspension served as the control group, while the suspension containing the ZnO@ZIF-8/Ag NPs constituted the experimental group. Both samples were placed in the sample chamber of an isothermal microcalorimeter to monitor the real-time metabolic heat flow changes of the bacteria. The dynamic heat flow was recorded using calView 2.0 software (Calm Sea Technologies, USA), which generated thermal power–time curves over the monitoring period.

### 1.6.8 Molecular docking

AutoDock1.5.6 (The Scripps Research Institute, USA) software was used to perform molecular docking calculations between the Zn2+, ZIF-8, Ag+ and *β*-lactamase with the aim of exploring the interaction mechanisms between them. Visualization analysis of the molecular structures was conducted using PyMOL2.5 (Schrödinger, LLC, USA） software to further elucidate the binding sites of the material with *β*-lactamase and its potential effects on the bacterial cell membrane.

## 1.7 In vivo and in vitro biocompatibility assessment

### 1.7.1 Cell co-culture

RAW 264.7 macrophages in good growth condition were selected and seeded in 6-well cell culture plates at a density of 5 × 105 cells/well. The lentivirus-constructed fluorescent tag mCherry was added to the cell culture medium to infect the cells. The infected RAW 264.7 macrophages were then transferred to culture dishes. After cell adhesion, 30 μg/mL of CY5-PEG-SH-labeled sterilized materials were added to make up the experimental group, while the control group received no additional materials. The cells were co-cultured for 24 h at 37°C with 5% CO₂, and the cell morphology was observed using an inverted fluorescence microscope.

### 1.7.2 Hemolysis assay

A hemolysis assay was performed using 4% red blood cells. The PBS solution of ZnO@ZIF-8/Ag NPs was mixed with the 4% red blood cell suspension and incubated at 37°C for 1 h. Following centrifugation at 2000 rpm for 10 min, the supernatant was collected to determine the hemolysis percentage via photographic documentation and absorbance measurement at 490 nm. The hemolysis ratio was calculated as follows:

Hemolysis (%) = (Ax − APBS) / (ADI − APBS) × 100%

where Ax represents the absorbance of experimental group x at different concentrations, APBS denotes the absorbance of the PBS group (positive control), and ADI indicates the absorbance of the deionized water group (negative control).

### 1.7.3 Cell migration

L929 mouse fibroblasts were seeded in 6-well plates at a density of 5 × 105 cells/well and cultured at 37°C with 5% CO₂ until a confluent monolayer formed. The culture medium was then removed, and a sterile 200 μL pipette tip was used to create a scratch perpendicular to the marked line on the plate. The cell monolayer was washed three times with PBS to remove the cellular debris dislodged during scratching, and baseline images at 0 h were captured to record the initial state. A serum-free medium with ZnO@ZIF-8/Ag was then added to each well, and the culture plate was returned to the 37°C, 5% CO2 incubator for continued cultivation. At 12 h and 24 h post-treatment, the cell migration was imaged under a microscope, and the migration distance was quantitatively analyzed using ImageJ (V1.8.0.112) software to compare the effects of the different treatment conditions on the cell migratory capacity. The migration rate (%) was calculated as

(A0 − At) / A0 × 100%

where A0 represents the scratch area at 0 h, and At denotes the scratch area at t h.

### 1.7.4 In vivo biocompatibility assessment

The ZnO@ZIF-8/Ag NPs were injected into the medial thigh muscle tissue of Sprague-Dawley (SD) rats. After 3 days, the rats were euthanized, and the muscle tissues containing the injected samples were fixed with a 4% paraformaldehyde solution for 24 h. Following paraffin embedding and sectioning, H&E staining was performed to observe the histological results.

## 1.8 Assessment of internal wound healing

### 1.8.1 Construction of a bacterial infection wound model

All the animal experiments were approved by the University Animal Care and Use Committee (Approval No. XJTUAE2024-2151). Twenty-four male SD rats were randomly divided into four groups (*n* = 6): (1) PBS group (control); (2) ZnO group; (3) ZnO@ZIF-8 group; (4) ZnO@ZIF-8/Ag group. After anesthetizing the rats with tribromoethanol, the dorsal hair was shaved. A full-thickness skin wound with a diameter of approximately 2 cm was created using sterile surgical scissors. To establish the infection model, 10 µL of bacterial suspension at a concentration of 1 × 109 CFU/mL was evenly applied to the central area of the wound. Twelve hours after the wound creation, 10 µL of the ZnO, ZnO@ZIF-8, and ZnO@ZIF-8/Ag solutions at 1× the minimum inhibitory concentration (MIC) were applied separately to medical gauze pre-coated with petroleum jelly. The treated dressings were then placed on the corresponding wound areas and secured with sterile adhesive and elastic bandages. The wound images were captured on days 0, 3, 6, and 9 to analyze changes in the wound area. Body weight was monitored in real time, and the wound area and healing rate were calculated using ImageJ software.

### 1.8.2 Histological analysis

On days 3 and 7 postinfection, skin tissue samples were collected from the wound sites. The specimens underwent fixation with 4% paraformaldehyde, followed by dehydration, paraffin embedding, and sectioning into 4 μm-thick slices. Wound healing progression was evaluated through H&E staining and Masson’s trichrome staining techniques.

### 1.8.3 Immunofluorescence staining

The infected rat tissues were harvested 5 days postinfection and fixed in 4% paraformaldehyde, followed by paraffin embedding. After sectioning, the tissue slices were incubated with 0.3% Triton X-100 for 10 min at room temperature, then blocked with 1% bovine serum albumin for 20 min. The sections were incubated with primary antibodies, namely anti-IL-6 (GB11117), anti-IL-10 (GB11534), anti-TNF-α (GB115701), anti-CD31 (GB11063-2), anti-CD86 (GB115630), anti-CD206 (GB113497), anti-VEGF (GB15165), anti-COL-Ⅰ (GB11022-3), anti-FN (GB113811), and anti-PCNA (GB11010), for 2 h at room temperature. Following incubation, the sections were treated with fluorescence-conjugated secondary antibodies (CY3-labeled goat anti-rabbit IgG, GB21303) for 1 h. 4',6-diamidino-2-phenylindole (DAPI) (1 μg/mL) was applied to the samples, which were then incubated for 10 min at room temperature away from light. Finally, an anti-fade mounting medium was applied, and the samples were mounted on glass slides for imaging using a digital pathology slide scanner (Aperio VERSA, Leica Biosystems, USA).

# 2. Supplementary Figures

Figure S1. Particle size distribution of the ZnO, ZnO@ZIF-8, and ZnO@ZIF-8/Ag NPs.

Figure S2. Particle size distribution of Ag on the ZnO@ZIF-8/Ag NPs.

Figure S3. TEM image and particle size distribution of elemental Ag.

Figure S4. EDS elemental mapping of the ZnO@ZIF-8/Ag NPs.

Figure S5. Adsorption energy of Ag for H2O2 and O2.

Figure S6. Results of the diffusion test on filter paper shown in Figure S6. The control group (DI) and the ZnO, ZnO@ZIF-8, and ZnO@ZIF-8/Ag groups are represented by I, II, III, and IV, respectively.

Figure S7. MIC test results for the ZnO@ZIF-8/Ag NPs.

Figure S8. Quantitative analysis of the antibacterial biofilms of the ZnO@ZIF-8/Ag NPs.

Figure S9. Ion release test results for ZnO@ZIF-8/Ag.

Figure S10. Binding energy of Zn2+, ZIF-8, and Ag+ with *β*-lactamase.

Figure S11. Number of bacteria in the infected tissue.

Figure S12. Immunofluorescence image of PCNA.
